# Supplementary material for: Supernova: A Versatile Vector System for Single-Cell Labeling and Gene Function Studies in vivo
Source: PubMed Central journal article supplement (PMC5075795; doi:10.1038/srep35747), 2016-10-24
Supplement: srep35747-s1.pdf [file srep35747-s1.pdf]

**Supplementary Information**

**Supernova: A Versatile Vector System for  
Single-Cell Labeling and Gene Function Studies  
in vivo**

Wenshu Luo, Hidenobu Mizuno, Ryohei Iwata, Shingo Nakazawa, Kosuke Yasuda, Shigeyoshi Itohara and Takuji Iwasato

**Supplementary Information Inventory**

Supplementary Figures 1-13

Supplementary Tables 1-2

**a IUE-based Supernova XFP (SnXFP)**

TRE-SSR

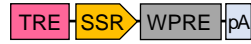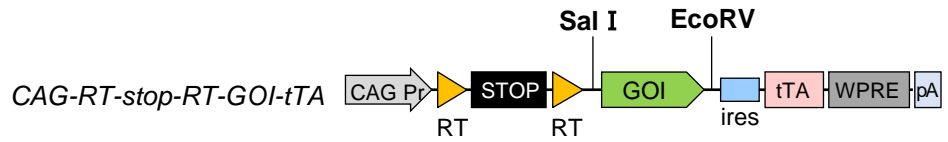

**b**

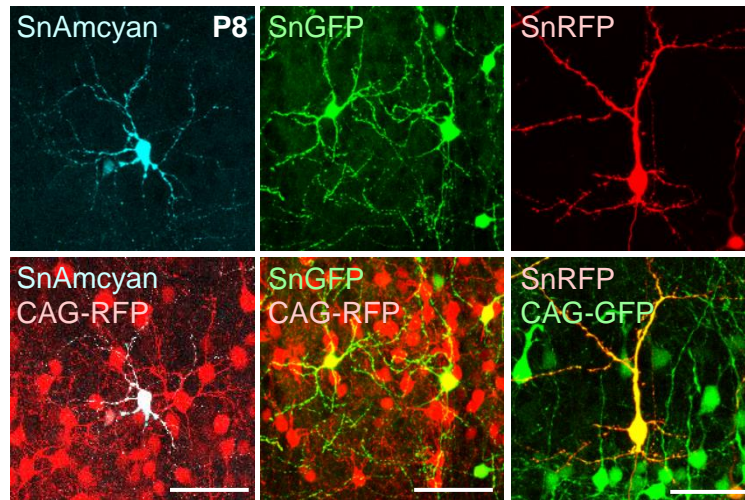

**c**

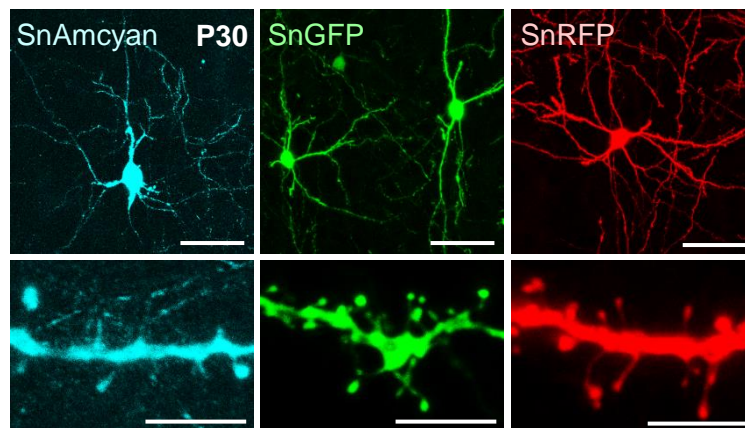

**Supplementary Figure 1. A fluorescent protein can be replaced with another protein easily in Supernova system**

(a) Restriction sites (Sall/EcoRV) were introduced into the CAG-RT-stop-RT-GOI-tTA vector<sup>18</sup>. Therefore, any gene of interest (GOI; e.g., GFP and RFP) can be easily subcloned into this vector.

(b) Cortical neurons sparsely labeled with various fluorescent proteins by the Cre-based Supernova system [Supernova-AmCyan (SnAmCyan), Supernova-GFP (SnGFP) and Supernova RFP (SnRFP)]. CAG-GFP or CAG-RFP was introduced together to label transfected cells. Scale bars, 50  $\mu\text{m}$ .

(c) High intensity of Supernova labeling enabled clear visualization of dendritic spines. Scale bars: 50  $\mu\text{m}$  (upper); 5  $\mu\text{m}$  (lower).

**a** Supernova-labeled cortical neurons

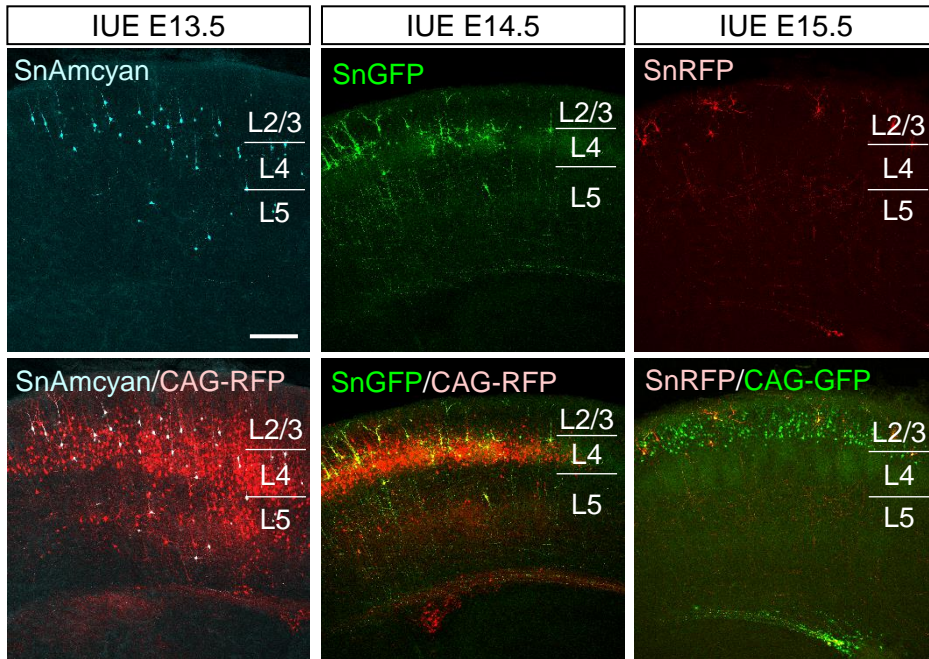

**b** Supernova-labeled hippocampal CA1 neurons

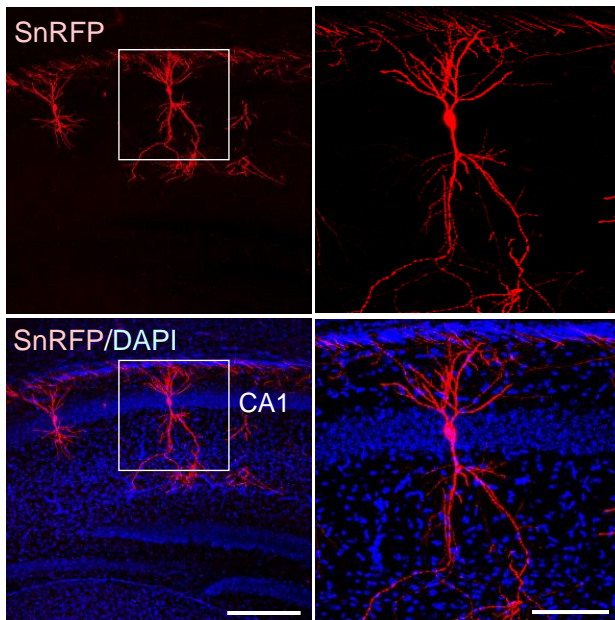

**Supplementary Figure 2. IUE-based Supernova is applicable to various brain regions.**

(a) IUE-mediated Supernova enabled sparse labeling of cortical neurons. Supernova AmCyan (SnAmCyan) was delivered to layers 2-5 (L2-L5) by in utero electroporation (IUE) at embryonic day 13.5 (E13.5). SnGFP and SnRFP were delivered into L4 and L2/3 cortical neurons by IUE at E14.5 and E15.5, respectively. Cre-based Supernova was used in these experiments. CAG-GFP or CAG-RFP vector was co-electroporated to indicate transfected neurons. Scale bars, 250 $\mu$ m.

(b) Supernova can also be adapted to the hippocampus. Flpe-based SnRFP was introduced into hippocampal CA1 pyramidal neurons by IUE at E14.5. Hippocampal slice was prepared at P14. Right: higher-magnification images of the square in the left panel. Scale bars: 250  $\mu$ m (left); 100  $\mu$ m (right).

**a Flpe-based Supernova RFP (Flpe-SnRFP)**

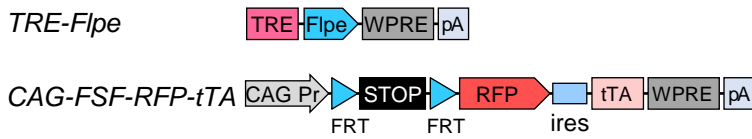

**b Flpe-SnRFP $\Delta$ tTA (Control)**

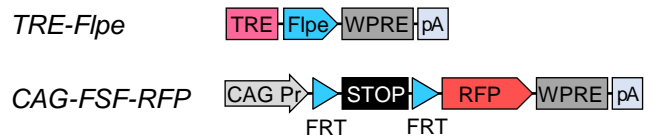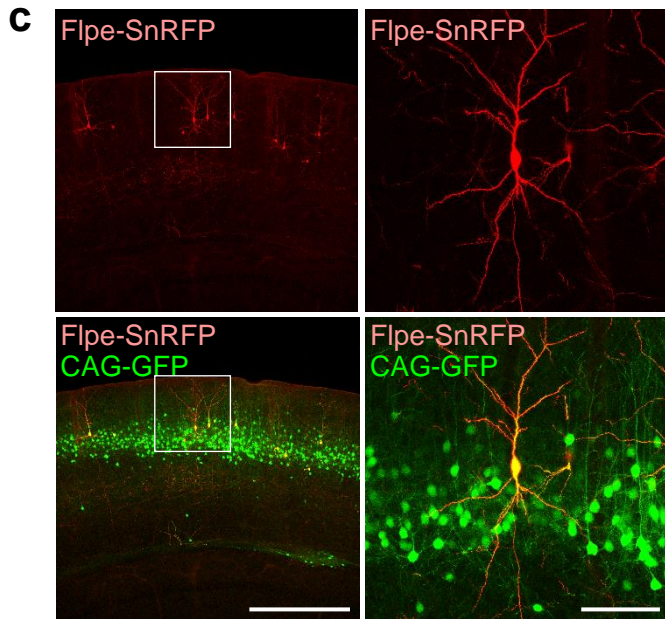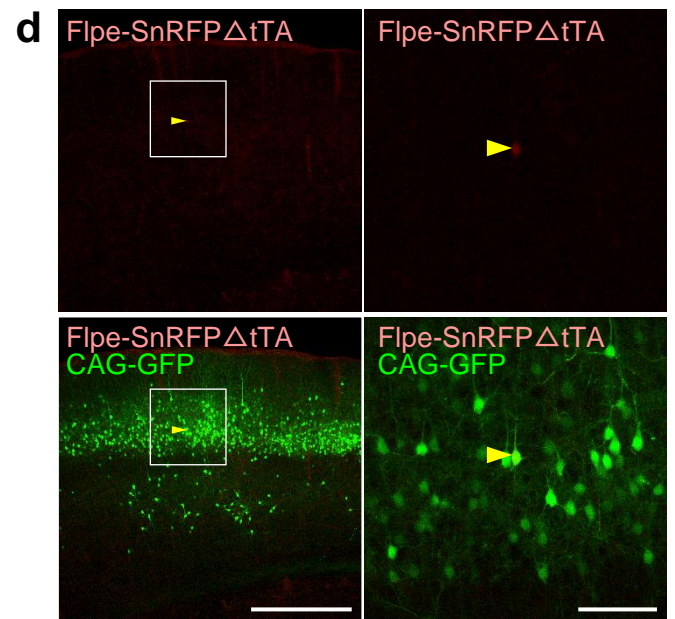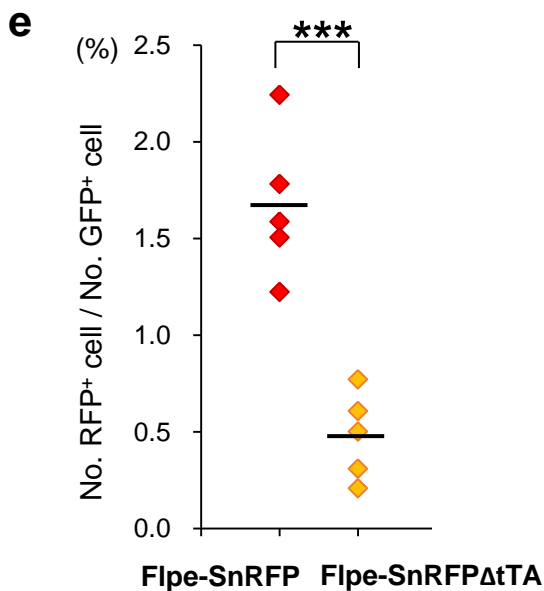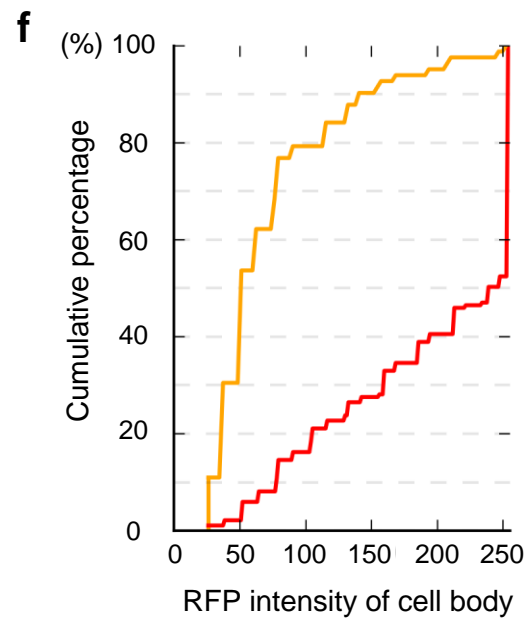

◆ Individual mouse electroporated with Flpe-SnRFP  
 ◆ Individual mouse electroporated with Flpe-SnRFP $\Delta$ tTA  
 — Mean value

— Flpe-SnRFP  
 — Flpe-SnRFP $\Delta$ tTA

**Supplementary Figure 3. tTA/TRE cycles significantly enhanced RFP expression in SnRFP-labeled neurons.**

(a) Schematics showing Flpe-based Supernova RFP (Flpe-SnRFP).

(b) As a control for examining the efficacy of tTA/TRE enhancement, Flpe-SnRFP $\Delta$ tTA (TRE-Flpe and CAG-FSF-RFP) was used. CAG-FSF-RFP vector was generated by removing ires-tTA from the CAG-FSF-RFP-tTA vector.

(c,d) L4 cortical neurons labeled with Flpe-SnRFP (c) and Flpe-SnRFP $\Delta$ tTA (d). The CAG-GFP vector was co-electroporated to mark the transfected neurons. Right: higher-magnification of the square in the left panel. Arrowhead: A L4 cortical neuron darkly labeled by Flpe-SnRFP $\Delta$ tTA. Scale bars: 500  $\mu$ m (left panel); 100  $\mu$ m (right panel)

(e) In the Flpe-SnRFP $\Delta$ tTA-transfected cortex, RFP-labeled cells were barely found. The ratio of RFP-positive cell number to GFP-positive cell (transfected cell) number in Flpe-SnRFP $\Delta$ tTA-transfected cortex ( $0.5\% \pm 0.1\%$ ,  $n=5$  mice) was significantly lower than that in Flpe-SnRFP-transfected cortex ( $1.7\% \pm 0.2\%$ ,  $n=5$  mice). All values represent as mean  $\pm$  SEM. (\*\*\*)  $p < 0.001$ , Welch's  $t$ -test.

(f) In the Flpe-SnRFP $\Delta$ tTA-transfected cortex, barely found RFP-labeled cells were very dark. In contrast, in the Flpe-SnRFP-transfected cortex about half of labeled neurons are very bright showing saturated RFP signals (raw RFP intensity = 255 grey values). Because Flpe-SnRFP-labeling was much brighter than Flpe-SnRFP $\Delta$ tTA-labeling, acquisition parameters optimized for RFP signals in Flpe-SnRFP $\Delta$ tTA-labeled neurons usually led the saturation of RFP signals in Flpe-SnRFP-labeled neurons (85 cells/ 185 cells). Therefore, the degree of tTA/TRE enhancement could be underestimated in above quantification.

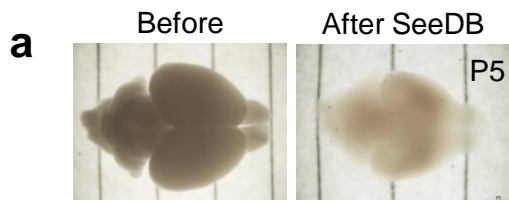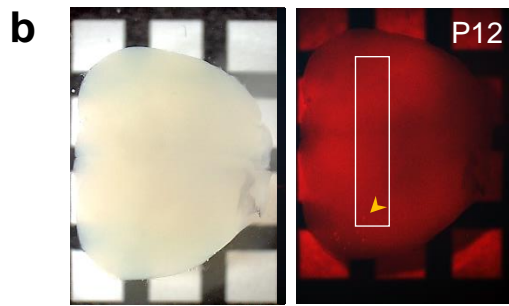

**c** Two-photon microscopy

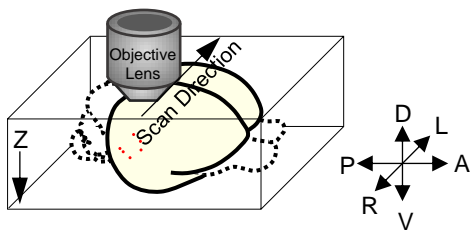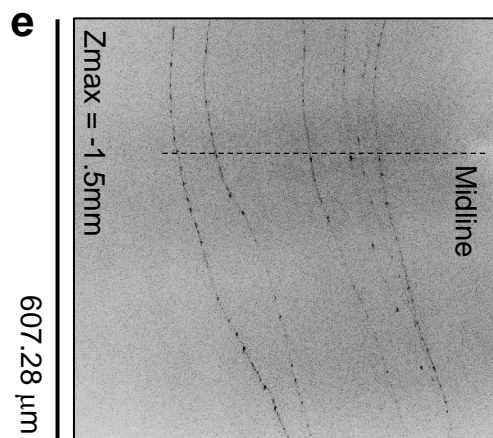

**d** Single callosal projection neuron (dorsal view)

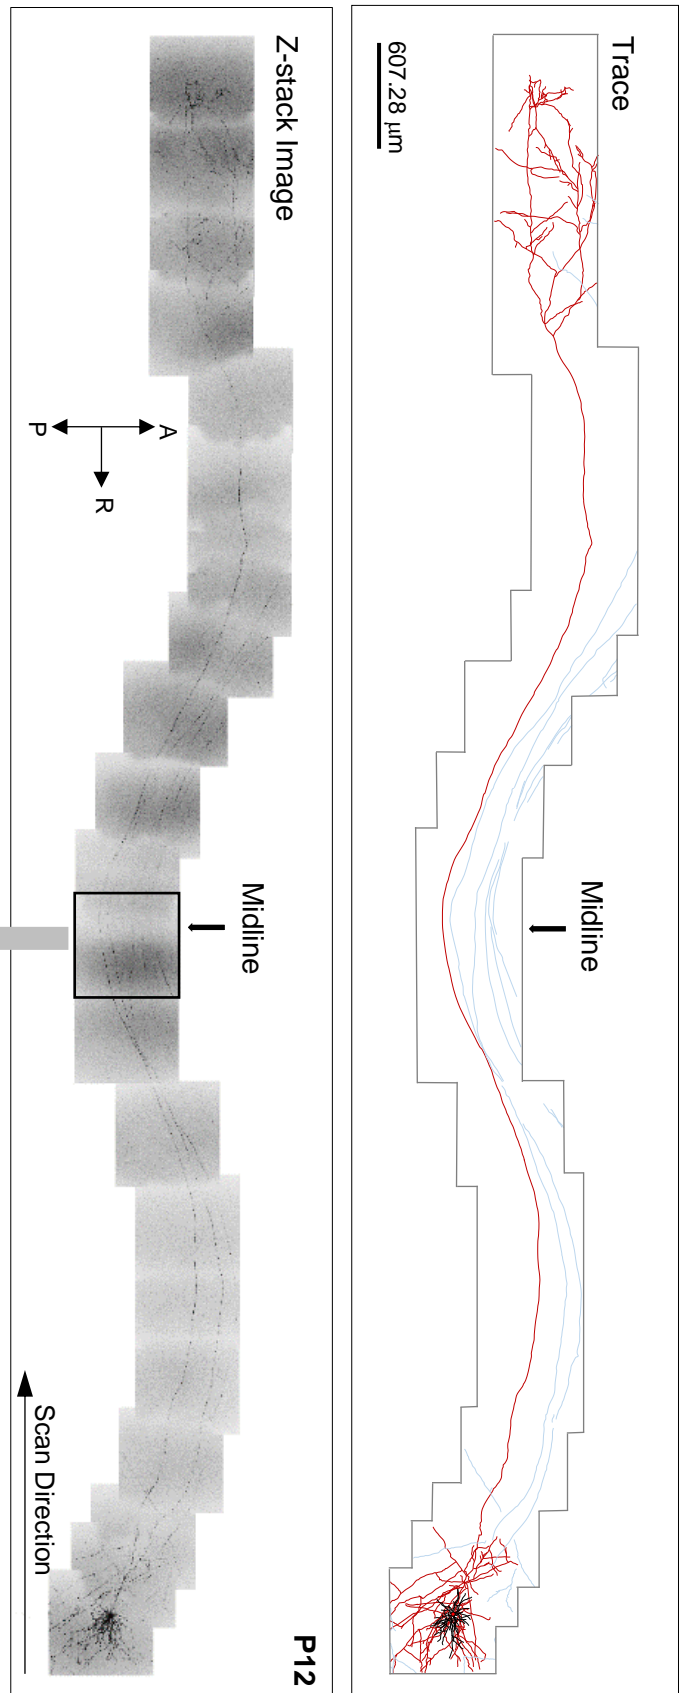



**Supplementary Figure 4. Imaging and reconstruction of an Flpe-SnRFP-labeled callosal projection neuron in intact whole brain.**

(a) Optical clearing of the P5 mouse brain using the SeeDB method<sup>33</sup>.

(b-e) Fluorescence imaging and reconstruction of an individual callosal projection neuron. (b) SeeDB-treated P12 brain that was electroporated with Flpe-SnRFP at E15.5. Box indicates the area imaged. (c) Two-photon microscopy was utilized to capture the

images of a labeled neuron (arrowhead in **b** right panel). D: dorsal; V: ventral; P: posterior; A: anterior; L: left; R: Right. (d) Z-stacked two-photon images (left panel) and trace (right panel) of the Flpe-SnRFP-labeled callosal projection neuron. Fine

morphological architecture and fluorescence signal were preserved in the SeeDB-cleared brain. Axons and dendrites of a single neuron are shown in red and black, respectively. Gray lines are axons from other neurons. All axons in the confocal

image were traced. (e) Enlarged image of the box shown in **d** left panel. High intensity of Supernova labeling enabled clear visualization of callosal projection axons that located

at 1.5mm from the cortical surface.

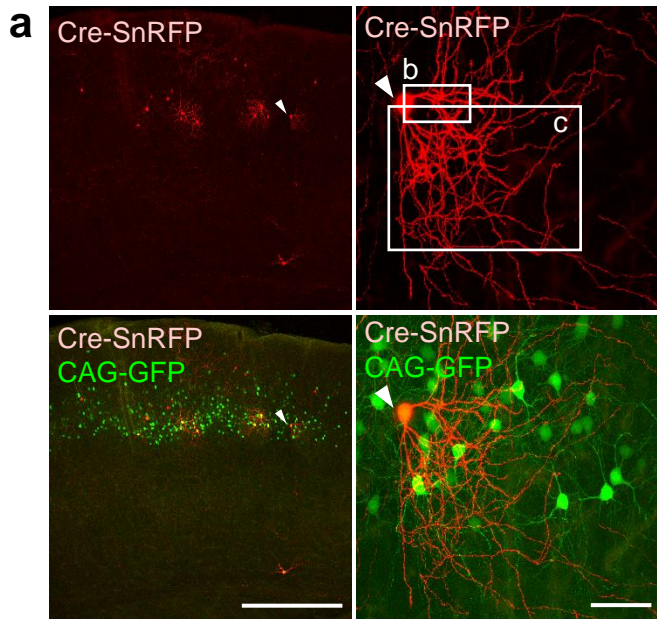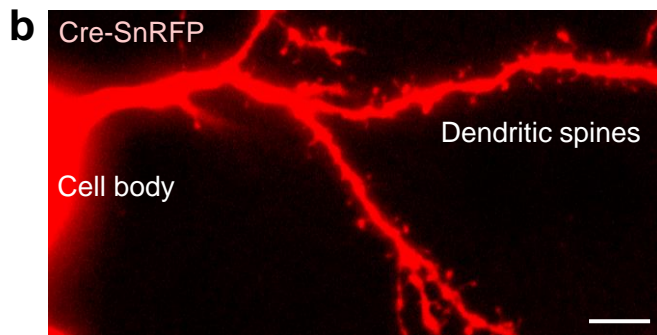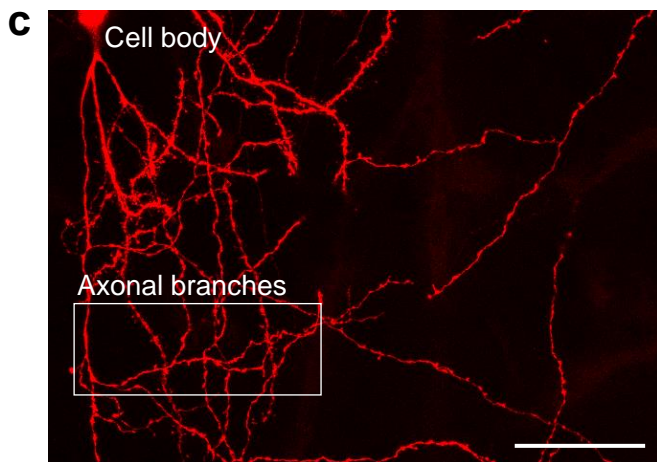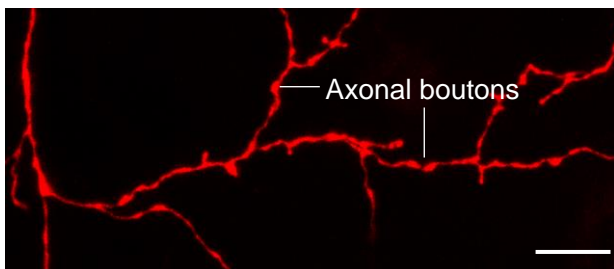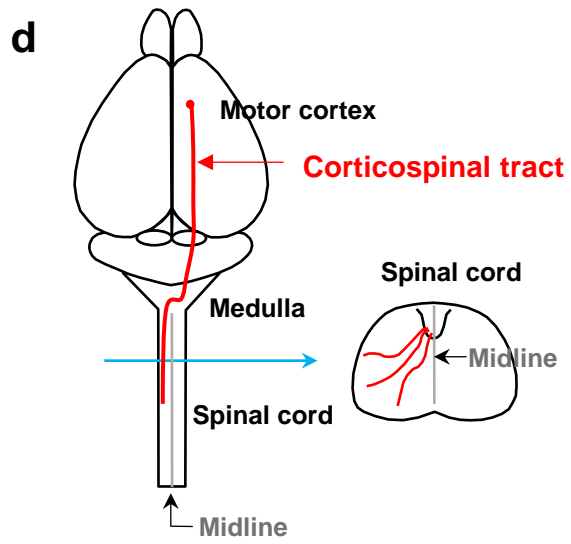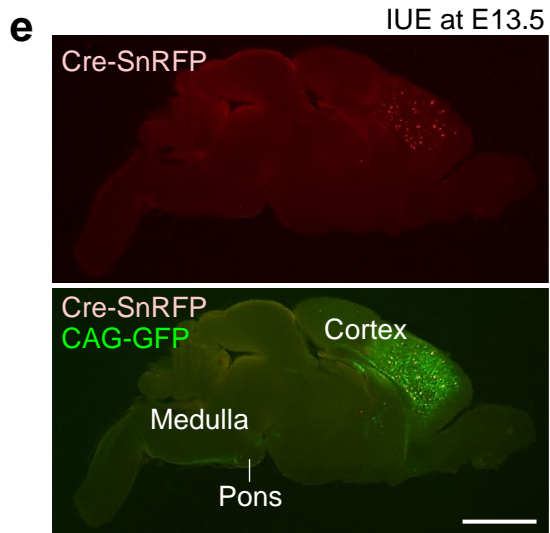

**f** Spinal cord, coronal section

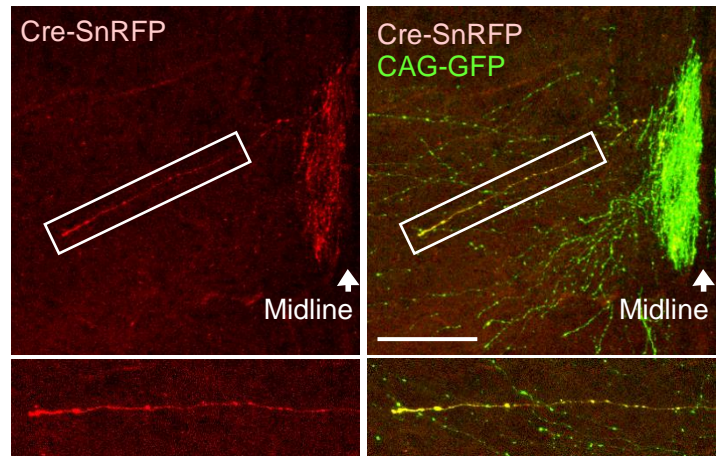

**Supplementary Figure 5. Supernova-labeling based on Cre/loxP recombination system**

(a) Cre-based Supernova RFP (Cre-SnRFP) enabled sparse and bright neural labeling, confirming our previous results. Cre-SnRFP was electroporated into L4 cortical neurons. CAG-GFP was co-transfected to indicate the transfected neurons. Brains were cut coronally. Arrowhead indicates a Cre-SnRFP-labeled spiny stellate neuron in L4 of the somatosensory cortex. Higher-magnification images are shown in right. Scale bars: 500  $\mu\text{m}$  (left panel); 50  $\mu\text{m}$  (right panel).

(b,c) Cre-based Supernova labeling was sparse and bright enough to visualize the detailed cellular morphology, including dendritic spines (b), axonal branches and buttons (c). c bottom panel: a higher-magnification image of the square in the upper panel with less image stacked. Scale bars: 5  $\mu\text{m}$  (b); 50  $\mu\text{m}$  (c, upper panel); 7.5  $\mu\text{m}$  (c, bottom panel).

(d) Schematic representation of the corticospinal tract axon (red line). Because the corticospinal tract is the longest axonal trajectory in the mammalian central nervous system, we chose it to assess the ability of Supernova in labeling long-range projection. Right panel: the coronal view of spinal cord.

(e) Cre-SnRFP and CAG-GFP were co-transfected into cortical neurons in the motor cortex by IUE at E13.5. Sagittal sections (100 $\mu\text{m}$ -thick) were made from the P5 mouse brain. Scale bar: 2.5 mm.

(f) Coronal sections at cervical enlargement of the spinal cord showed Cre-SnRFP-labeled single corticospinal axons. Lower panels: higher magnification images of the rectangles in the upper panels. Scale bar, 100  $\mu\text{m}$ .

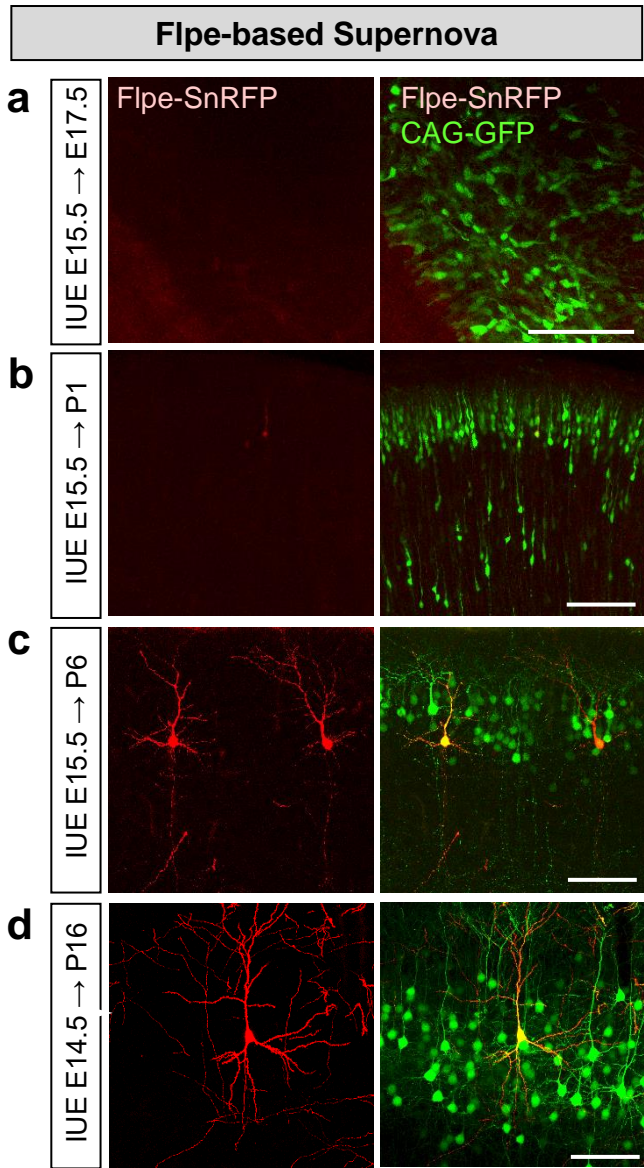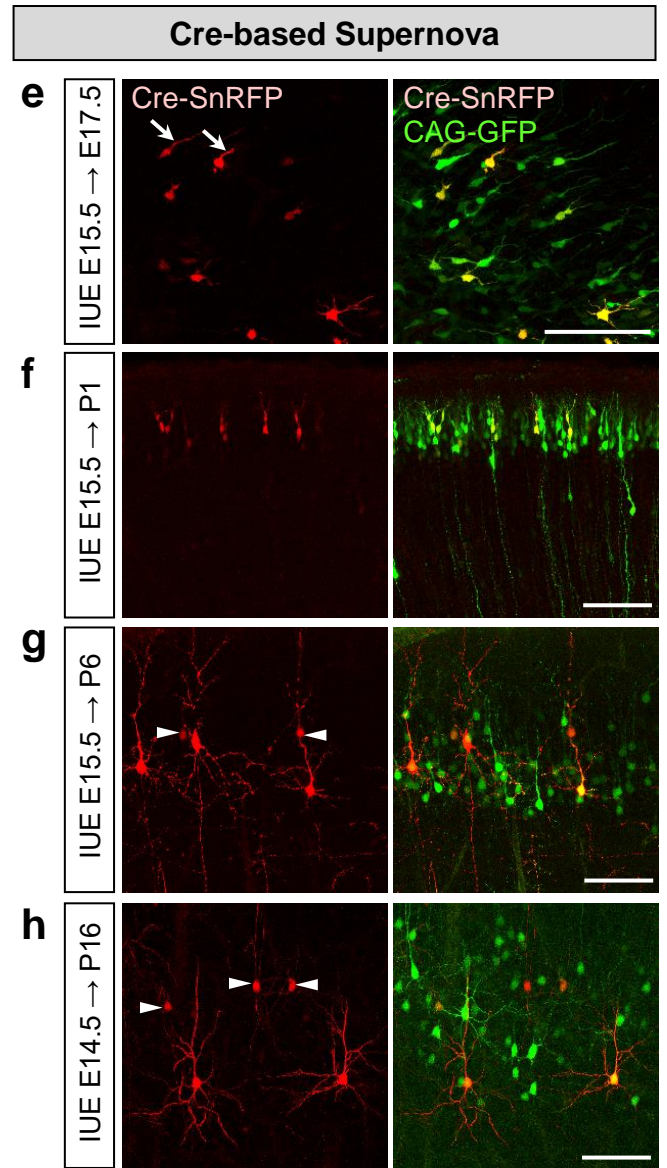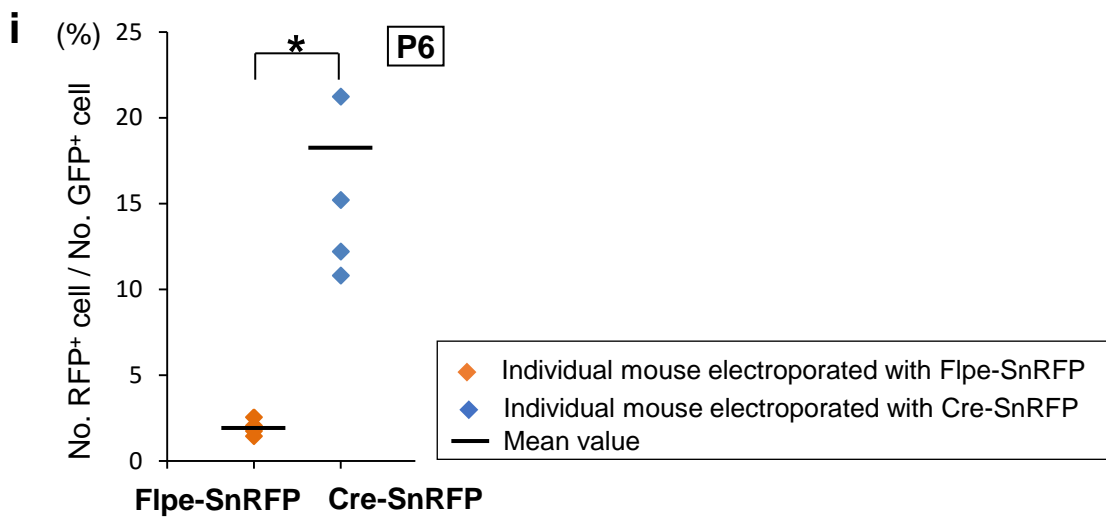

**Supplementary Figure 6. Flpe-based and Cre-based Supernova systems show some distinct features.**

(a-h) Flpe-SnRFP (a-d) and Cre-SnRFP (e-h) were introduced into cortical neurons, separately. The CAG-GFP vector was co-transfected to indicate transfected cells. The coronal sections were made from the E17.5, P1, P6 and P16 mouse brains. The Flpe-SnRFP signal was visible 5 days after IUE (at P1) (b). On the other hand, Cre-SnRFP signal was observed within 2 days after transfection (at E17.5), and leading processes of labeled neurons were clearly visible (arrows) (e). At P1, Cre-SnRFP was already bright enough to visualize dendritic morphology of labeled neurons (f). At P6, the brightness was similar between Flpe-SnRFP-labeling and Cre-SnRFP-labeling (c,g). The whole cellular morphology of both Flpe-SnRFP-labeled and Cre-SnRFP-labeled neurons were clearly visualized at this age. Note that although some dark cells (48/86 cells, 4 mice at P6; arrowheads in g,h) were found in Cre-based Supernova labeling, dark cells were rarely detectable (2/28 cells, 4 mice at P6) in Flpe-RFP-labeled cortex. Scale bars: 100  $\mu$ m.

(i) Compared to Cre-SnRFP, Flpe-SnRFP achieved better sparseness in neural labeling when the same concentration (5ng/ $\mu$ l) of TRE-SSR vector was used. At P6, 14.8% $\pm$ 3.3% (n=4 mice) of GFP-positive neurons were labeled by Cre-SnRFP. This ratio was significantly lower when Flpe-SnRFP was used for labeling, which was 1.9% $\pm$ 0.2% (n=4 mice). All values represent as mean $\pm$ SEM. (\*) P<0.05, Welch's *t*-test.

**a** Flpe-based Supernova

TRE-Flpe

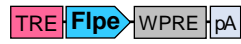

CAG-FSF-GFP-tTA

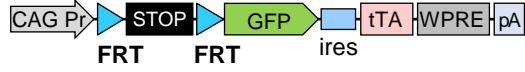

Recombination indicator

CAG-LSL-RFP

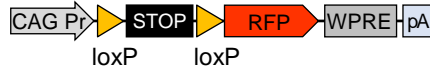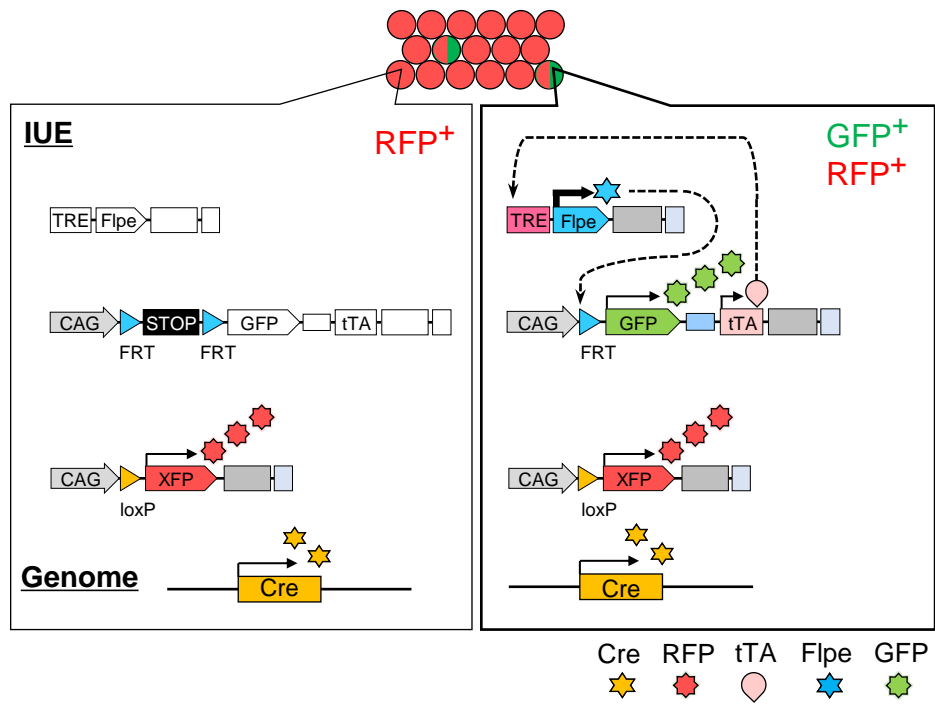

**b** Emx1Cre KI mouse

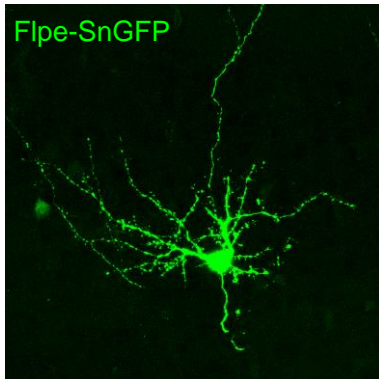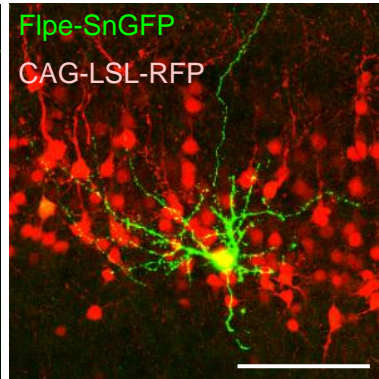

**Supplementary Figure 7. Supernova systems based on Flpe/FRT and Dre/rox enabled sparse neuronal labeling in Cre-expressing mice.**

(a) Illustrations show what happens in neurons transfected by Flpe-SnGFP (TRE-Flpe and CAG-FSF-GFP-tTA) and CAG-loxP-stop-loxP-RFP-WPRE-pA (CAG-LSL-RFP) in Cre-expressing areas. (b) When the CAG-LSL-RFP vector was introduced into the cortex of Emx1Cre knock-in (KI) mice, which exhibit Cre-mediated recombination in all excitatory neurons in the cortex<sup>32,38</sup>, neurons were labeled densely. In contrast, the Flpe-SnGFP vector set introduced together with the CAG-LSL-RFP vector labeled only a small population of cortical neurons, and dendritic morphologies of these SnGFP-labeled neurons were clearly visible. All Supernova-positive cells co-localized with Cre-expressing cells. IUE were performed at E14.5, the brains were dissected at P8 and coronal sections were made. Scale bar in **b**, 100  $\mu$ m.

**a Dre-based Supernova**

*TRE-Dre*

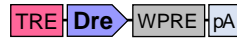

*CAG-RSR-GFP-tTA*

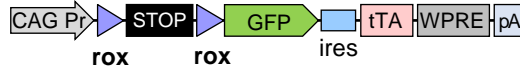

**Recombination indicator**

*CAG-LSL-RFP*

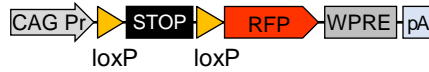

**b Emx1Cre knock-in mice**

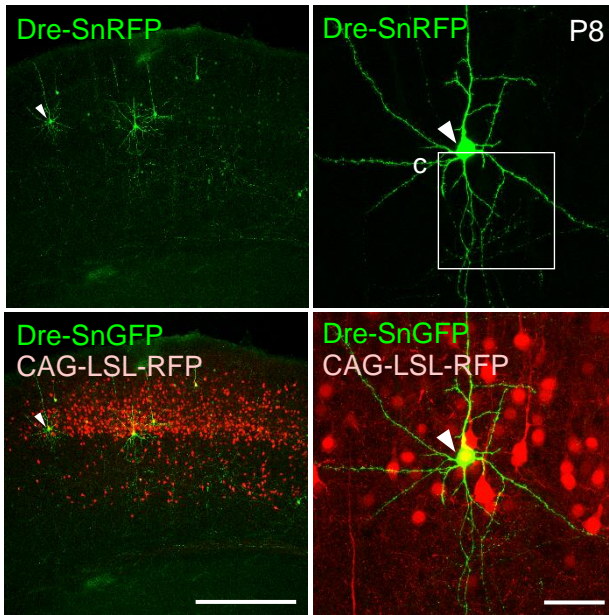

**c**

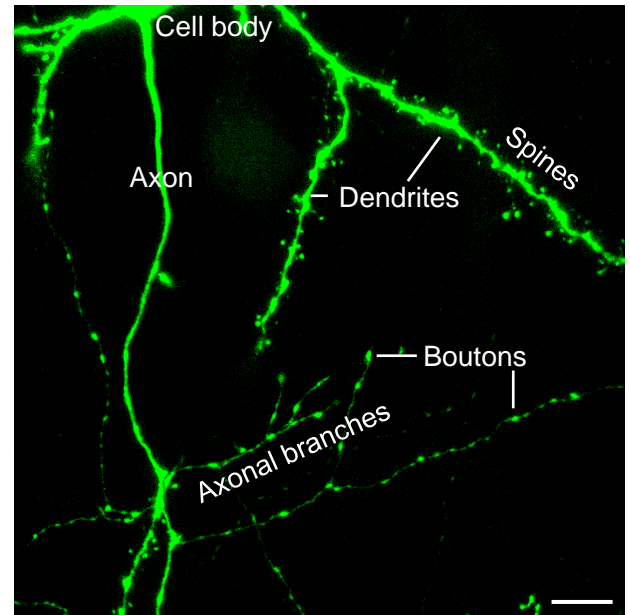

**d Emx1Cre knock-in mice**

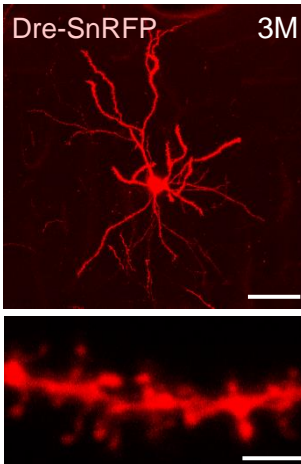



**Supplementary Figure 8. Supernova labeling based on Dre/rox recombination system.**

(a) Schematics showing Dre-based Supernova GFP (Dre-SnGFP) vector set (TRE-Dre and CAG-rox-stop-rox-GFP-tTA) and Cre-mediated recombination indicator (CAG-LSL-RFP).

(b) Supernova vector set based on Dre/rox recombination also enabled sparse and bright neural labeling. The whole cellular morphology can be clearly seen. Dre-based Supernova GFP (Dre-SnGFP) vector set (TRE-Dre and CAG-rox-stop-rox-GFP-tTA) was introduced into L4 cortical neurons of Emx1Cre knock-in (KI) mice<sup>38</sup> by IUE at E14.5. CAG-LSL-RFP vector was co-transfected. Right panel shows higher-magnification images of Dre-SnGFP labeled cortical neuron (arrows in left panels). Scale bars: 500  $\mu\text{m}$  (left panel); 50  $\mu\text{m}$  (right panel).

(c) The sparse and bright labeling via Dre-SnGFP enabled clear visualization of dendritic spines, axonal branches and axonal buttons of labeled neurons in **b** right panel. Scale bar, 10  $\mu\text{m}$ .

(d) The high intensity of Dre-based Supernova RFP (Dre-SnRFP)-labeling was maintained even in adult (3-month-old, 3M) mice, and enabled clear visualization of whole cellular morphology including dendritic spines. Scale bars: 50  $\mu\text{m}$  (upper panel); 2.5  $\mu\text{m}$  (bottom panel).

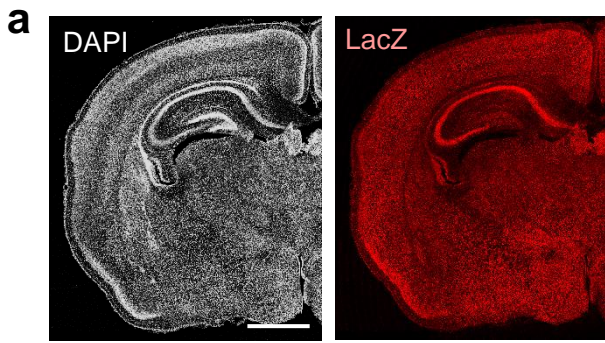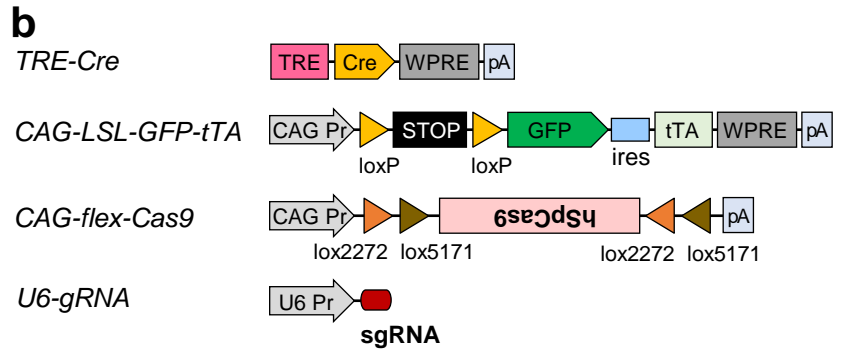

**c** IUE E14.5 → P5

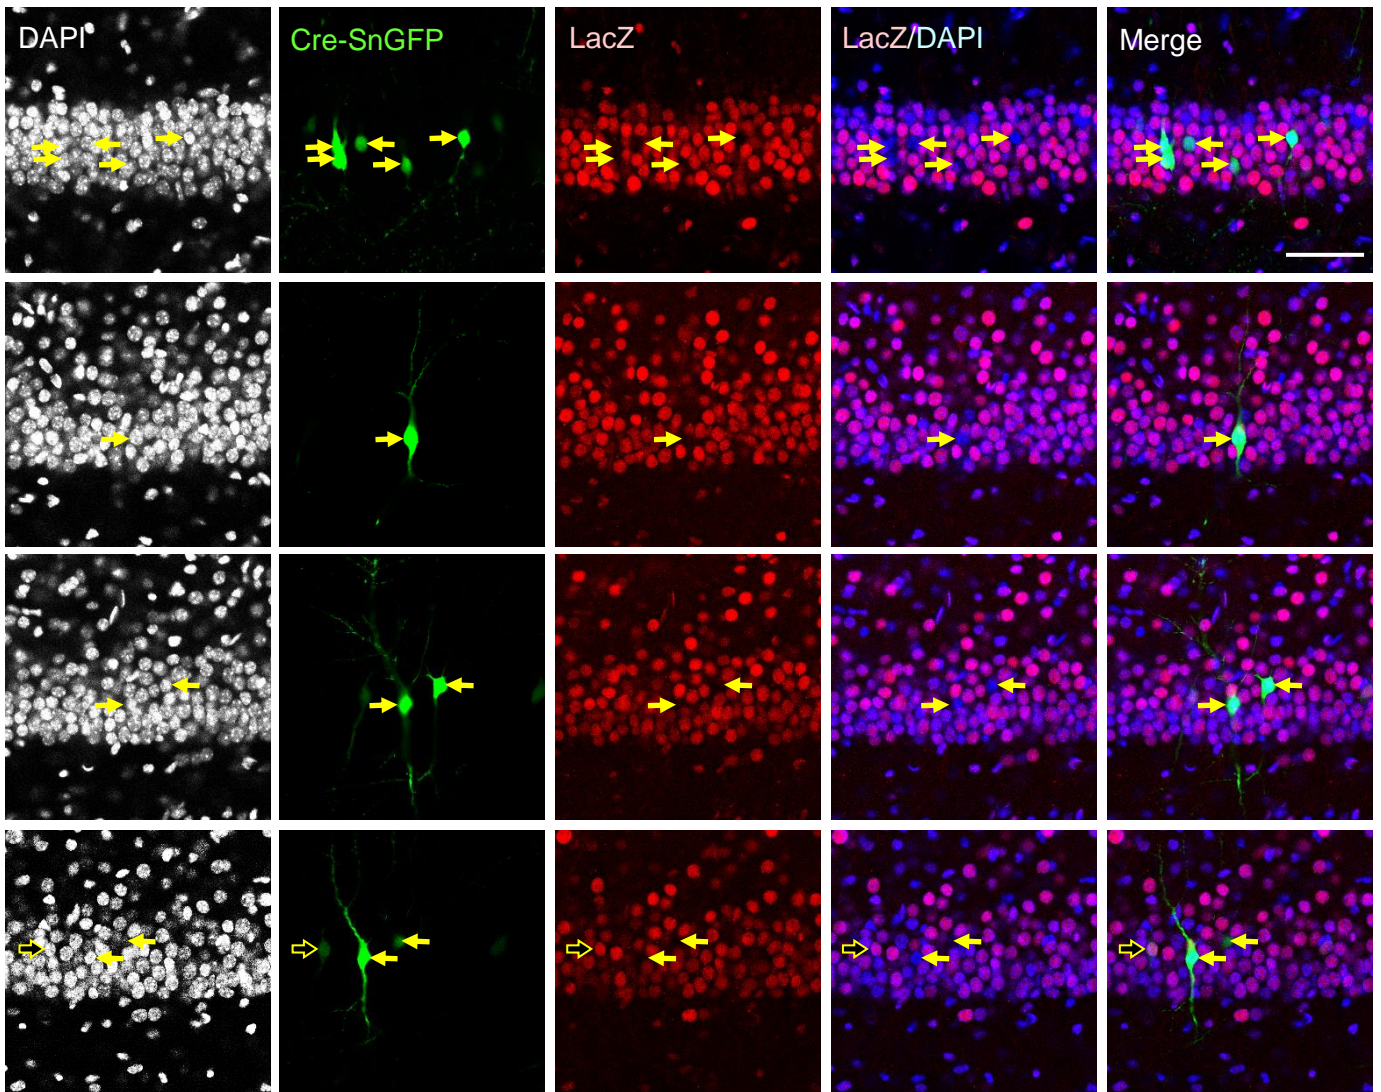

**Supplementary Figure 9. Supernova-mediated CRISPR/Cas9 effectively disrupted target gene expression at a single-cell level in vivo.**

(a) Rosa-LacZ mice ubiquitously express LacZ. Coronal sections (60 $\mu$ m-thick) were made from the P5 Rosa-LacZ mouse brain and stained with an anti- $\beta$ -gal antibody. Scale bar, 1 mm.

(b) Schematic representation of a Supernova-CRISPR/Cas9 vector set for single-cell genome editing. CAG-flex-Cas9 and U6-gRNA targeting LacZ vectors were described elsewhere<sup>12</sup>.

(c) LacZ expression was undetectable in most SnGFP-labeled hippocampal neurons (arrows, 39/45cells, 3 mice), although LacZ was ubiquitously expressed in surrounding GFP-negative neurons. Only in a few cases, LacZ expression was still detectable (hollow arrows, 6/45cells, 3 mice) in SnGFP-labeled neurons. Supernova-CRISPR/Cas9 that targets LacZ was electroporated into the hippocampus of Rosa-LacZ mice. LacZ expression was detected by an anti- $\beta$ -gal antibody. DAPI staining was performed to visualize the cell-body localization. Scale bar, 50  $\mu$ m.

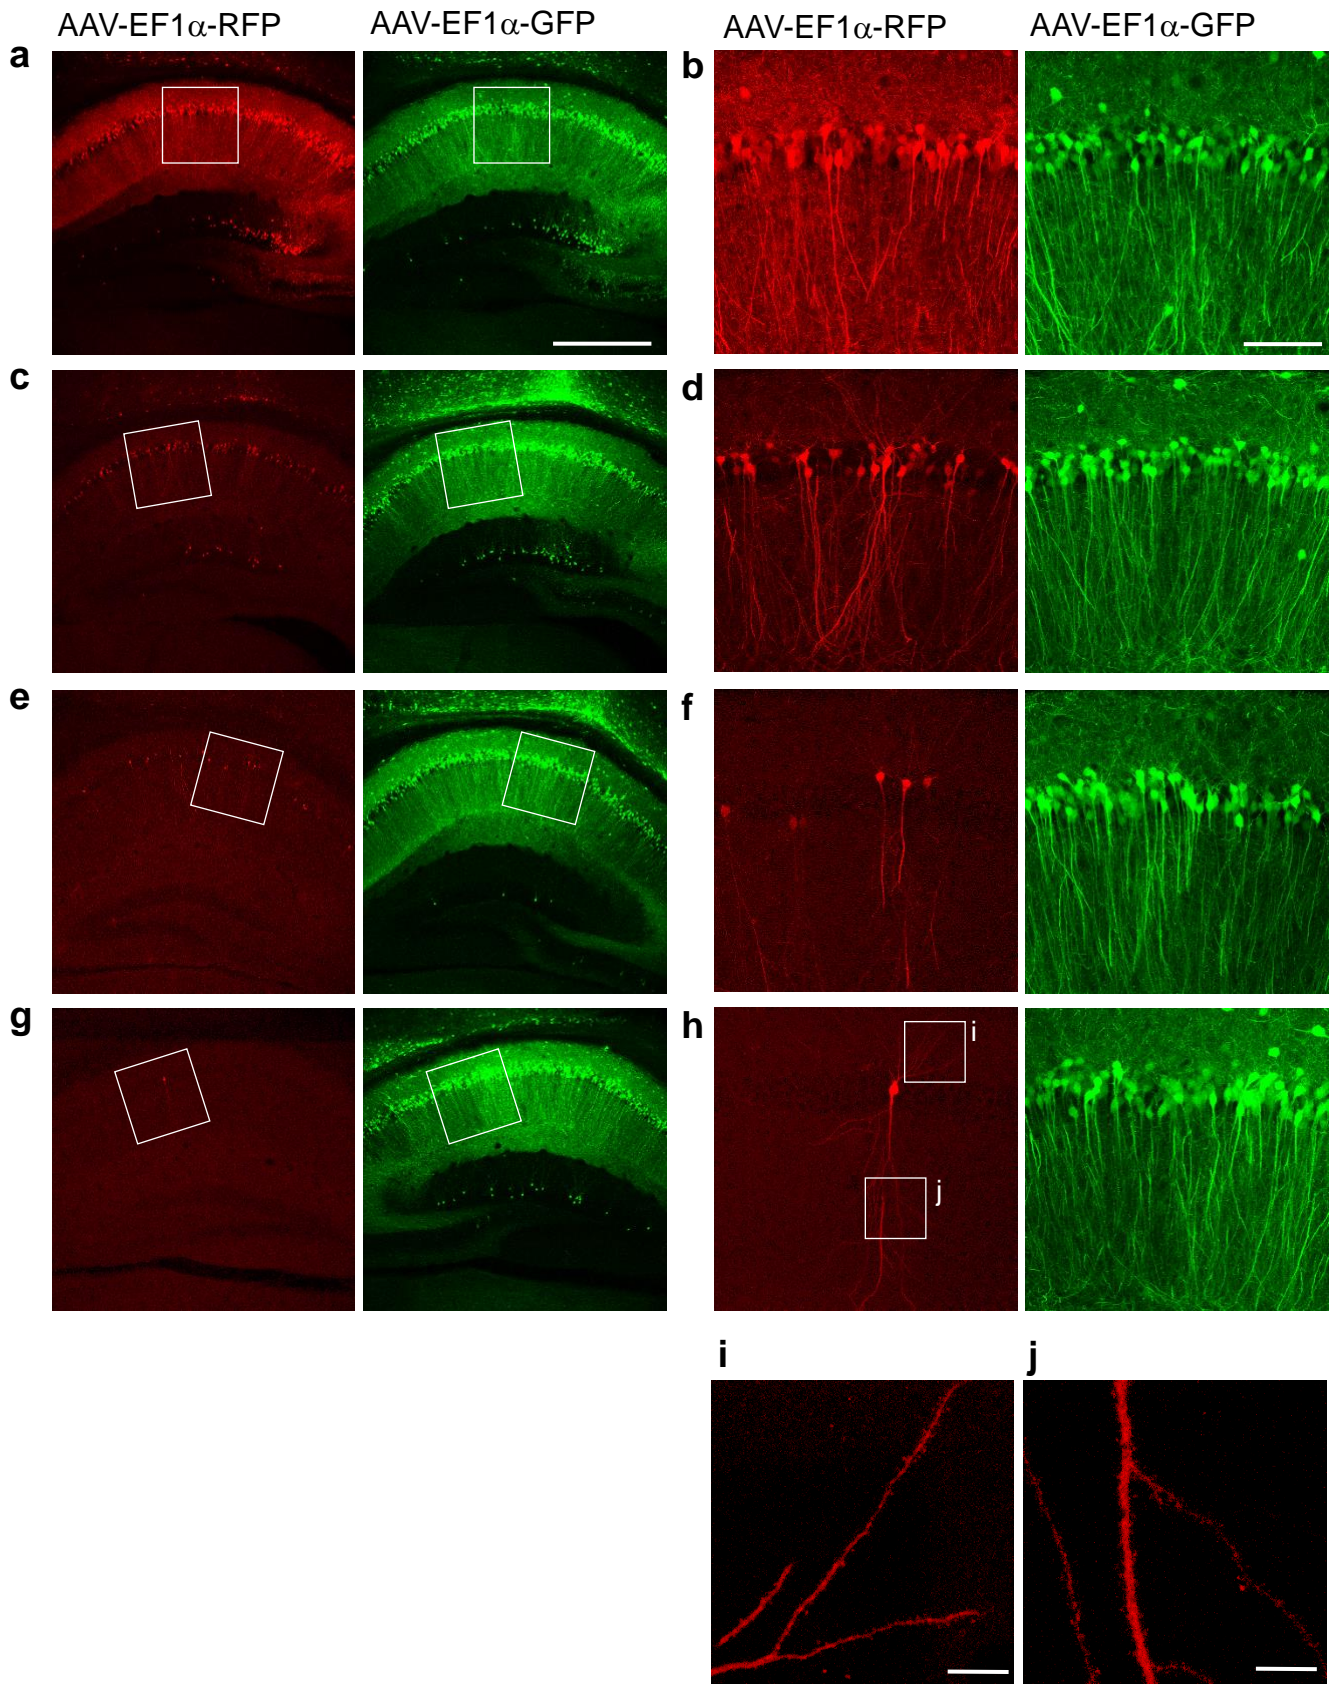

**Supplementary Figure 10. Dilution of conventional AAV vector resulted in sparse but dark cell labeling.**

(**a-h**) Hippocampal CA1 neurons labeled by AAV-EF1 $\alpha$ -RFP-WPRE. The titer of original AAV stock was  $5.5 \times 10^{11}$  genome copies/ml. Non-diluted virus or virus diluted  $10$ - $10^3$  folds in PBS was injected into P10 mouse brains (a-b: non-dilution, c-d:  $10$ -fold dilution, e-f:  $10^2$ -fold dilution, g-h:  $10^3$ -fold dilution; n=3 mice for each group). Infected brains were sampled at 36DPI. AAV-EF1 $\alpha$ -GFP-WPRE was co-injected as control. (**a,c,e,g**): low-power images. Scale bar, 500  $\mu$ m. (**b,d,f,h**): higher-magnification images of squares in **a,c,e,g**. Scale bar, 100  $\mu$ m.

(**i,j**) Higher-magnification images of the squares in **h**, showing the basal (**i**) and apical (**j**) dendrites of sparsely labeled CA1 neuron. In **i** and **j**, less images were stacked. The labeling is extremely faint that the dendritic branches and spines are hardly seen. Scale bars, 10  $\mu$ m.

AAV-SnRFP labeled cortical neuron, 10DPI

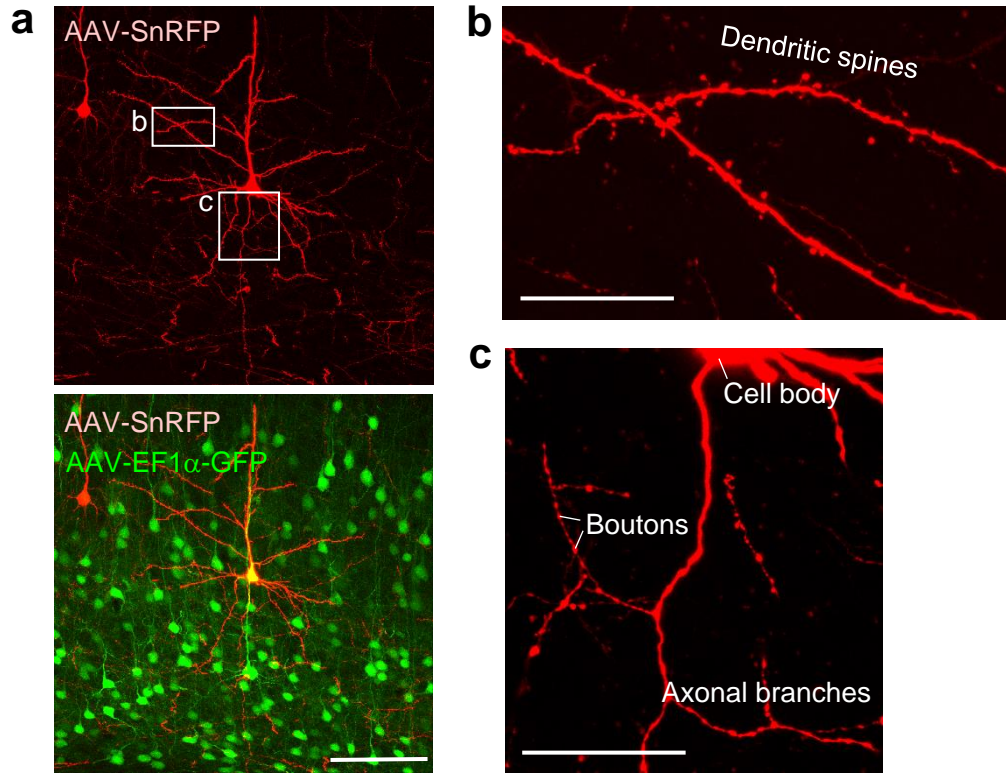

AAV-SnRFP labeled hippocampal CA1 neuron, 10DPI

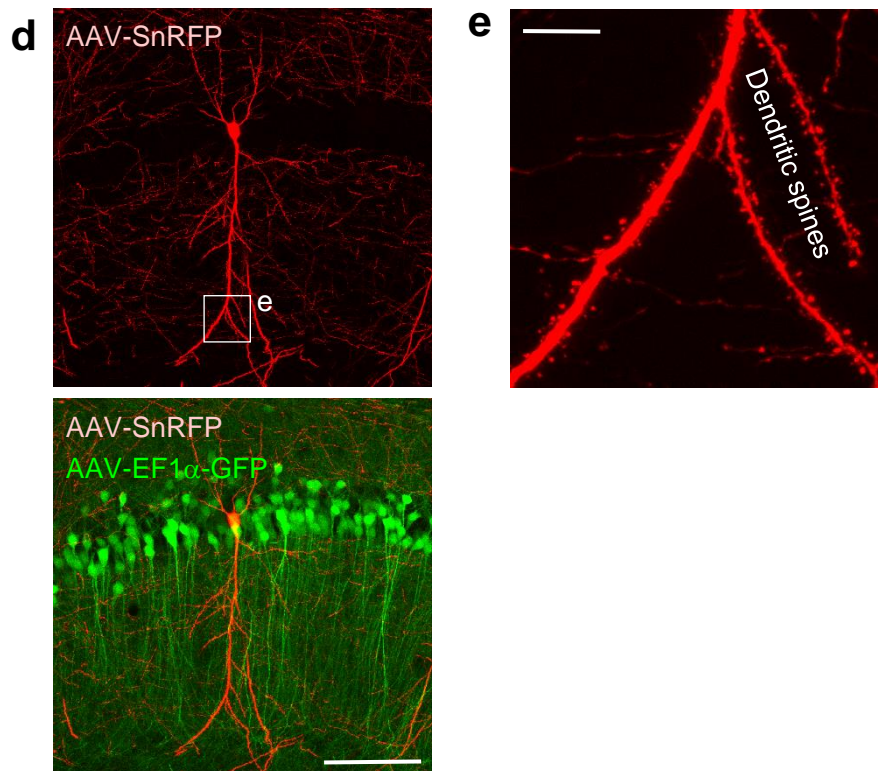

**Supplementary Figure 11. Dendritic spines of AAV-SnRFP-labeled neurons can be clearly observed at 10DPI.**

The detailed cellular morphology of AAV-SnRFP-labeled cortical neuron (**a-c**) and hippocampal neuron (**d,e**) can already be clearly visualized at 10 days after transfection. AAV-SnRFP was injected to P12 mouse brain. Brains were sampled at 10DPI and coronal sections were prepared. **b,c** and **e** are higher-magnification images of the rectangles in **a** and **d**. Scale bars, 100 $\mu$ m (**a,d**), 25 $\mu$ m (**b,c**), 10 $\mu$ m (**e**).

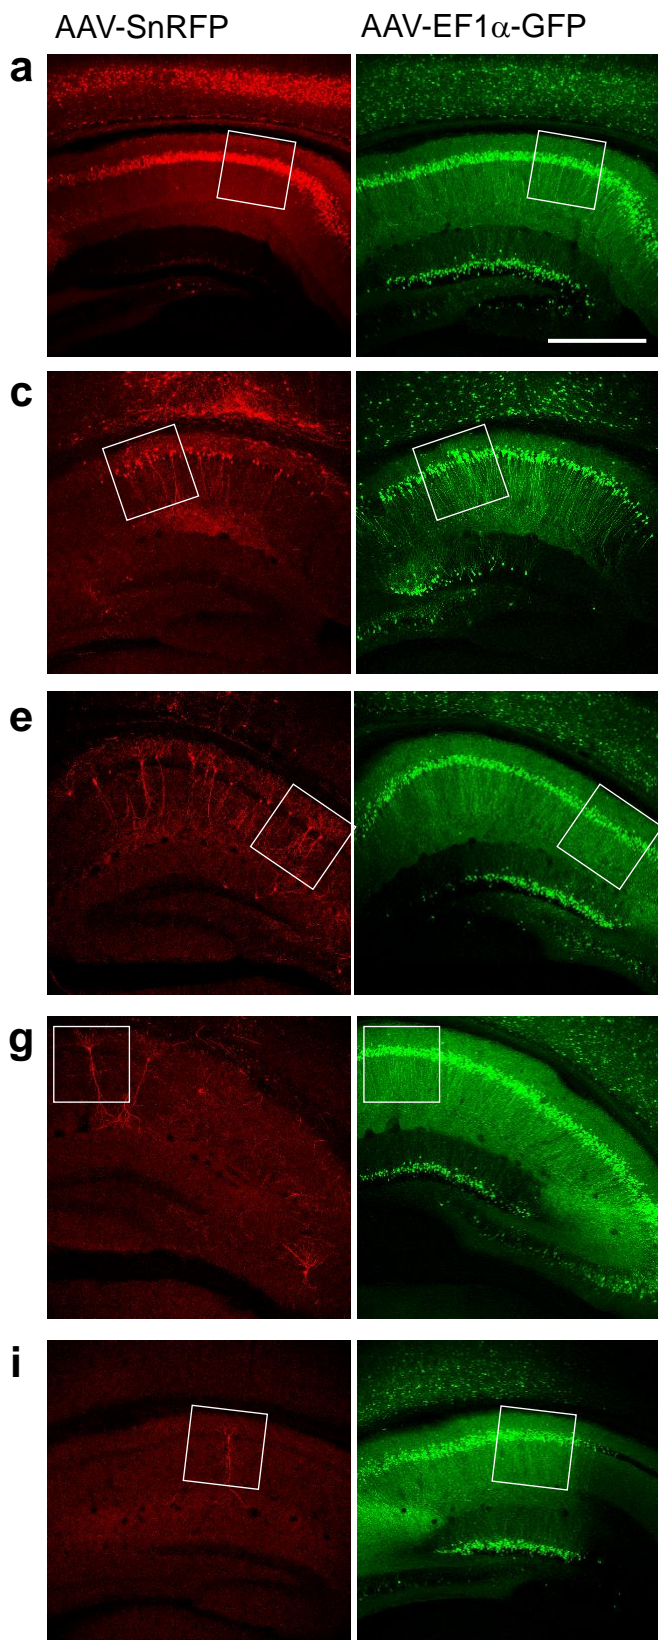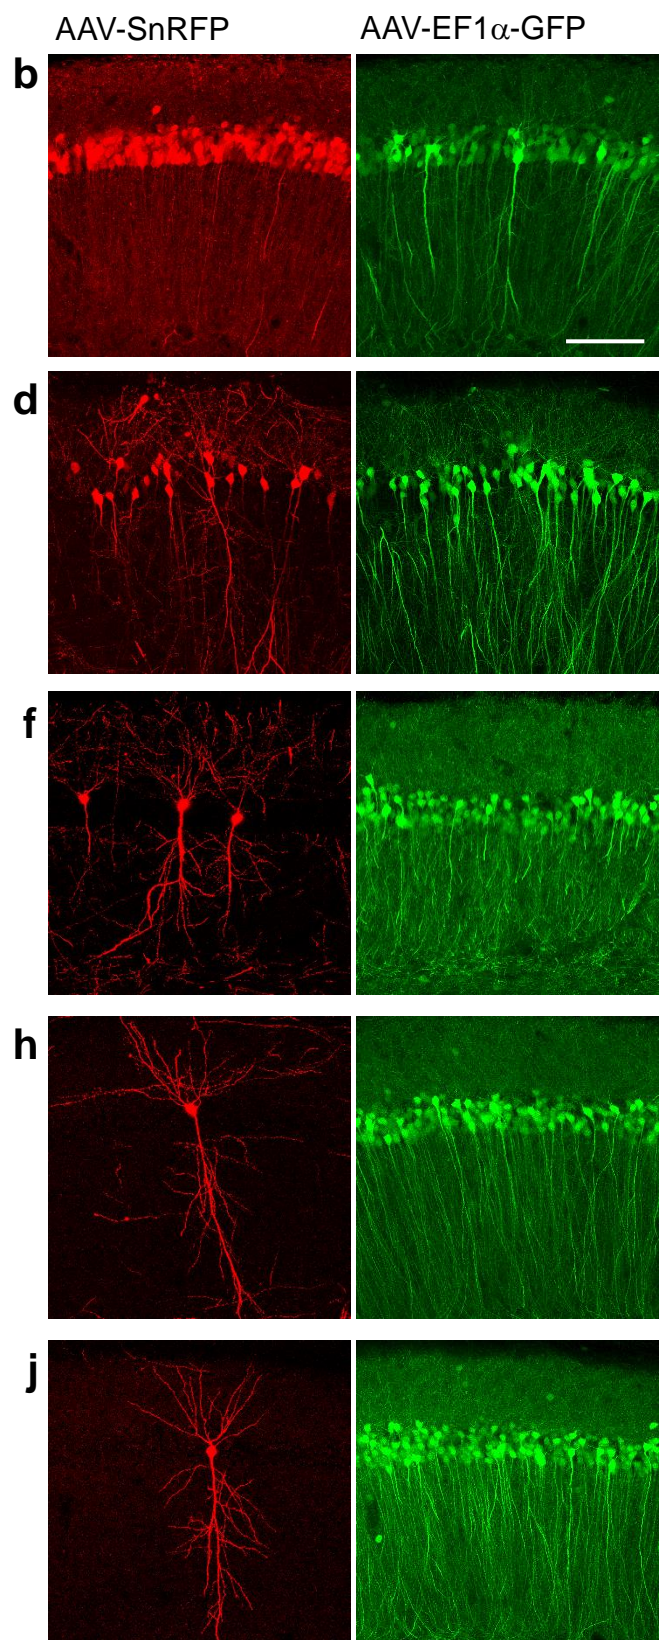



**Supplementary Figure 12. Labeling sparseness is adjustable in AAV-Supernova without affecting labeling brightness.**

Sparseness of AAV-SnRFP labeling was adjustable by simply changing the concentration of the AAV-TRE-Cre vector in viral mixture. Not like conventional AAV labeling (**Supplementary Fig. 10**), the labeling brightness was not changed by altering labeling sparseness. For AAV-SnRFP labeling, AAV-TRE-Cre-WPRE ( $2.3 \times 10^{13}$  genome copies/ml) was diluted  $10^2$ - $10^6$  folds in PBS. Equal amount of diluted AAV-TRE-Cre-WPRE and AAV-EF1 $\alpha$ -DIO-tTA-RFP ( $1.7 \times 10^{13}$  genome copies/ml) was mixed and injected into P11-P13 mouse brains (Dilution of AAV-TRE-Cre; **a-b**,  $10^2$ -fold dilution; **c-d**: $10^3$ -fold dilution; **e-f**: $10^4$ -fold dilution; **g-h**: $10^5$ -fold dilution; **i-j**: $10^6$ -fold dilution. n=3 mice for each group). AAV-EF1a-GFP-WPRE ( $3.5 \times 10^{11}$  genome copies/ml) co-infected as control. Brains were fixed at 30DPI. (**a,c,e,g,i**): low-power images. Scale bar, 500  $\mu$ m. (**b,d,f,h,j**): higher-magnification images of squares in **a,c,e,g,i**. Scale bar, 100  $\mu$ m.

**a** LacZ IHC with 1st antibody

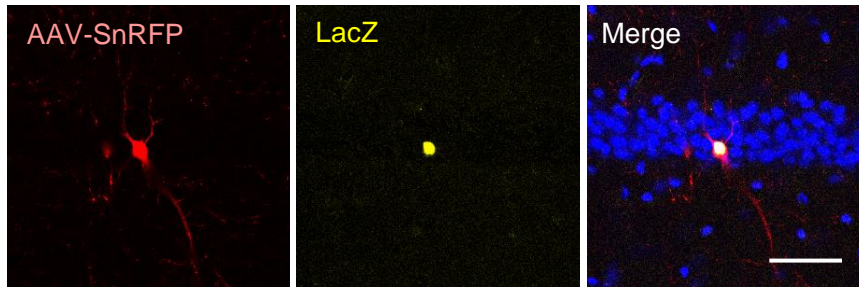

**b** LacZ IHC without 1st antibody (control)

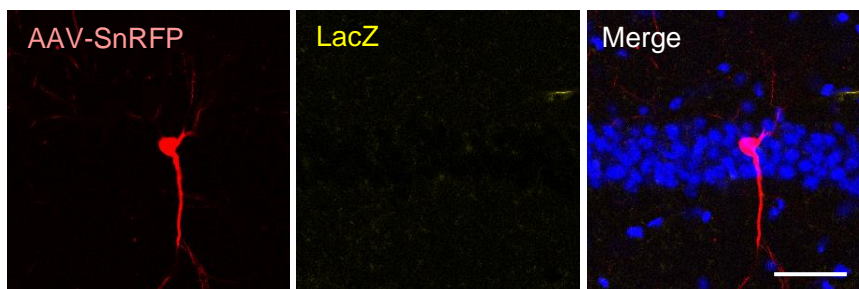

**Supplementary Figure 13. LacZ expression is detected specifically in**

**Supernova-labeled neurons in RNZ reporter mice**

**(a,b)** Related to **Fig.8h**. Cre-mediated genomic recombination in Rosa26-loxP-stop-loxP-nlsLacZ (RNZ) reporter mouse was detected only in SnRFP-labeled neurons in hippocampus CA1 **(a)**. Observed LacZ signals were not derived from the leakage of the strong AAV-SnRFP signal, because no LacZ signal was detected if the 1<sup>st</sup> antibody was not added **(b)**. Scale bar, 50 $\mu$ m.

**Supplementary Table 1. Vectors used in this study.**

| Vector # | Vector Name                                            |
|----------|--------------------------------------------------------|
| pK013    | pBS302(loxP-stop-loxP)                                 |
| pK016    | pCAG-Flpe-ires-Puro (GeneBridge)                       |
| pK021    | pLenti-Synapsin-hChr2 (H134R)-EYFP-WPRE                |
| pK023    | pTurboRFP-N (Evrogen)                                  |
| pK024    | pCAsalEGFP                                             |
| pK025    | pCAG-TurboRFP                                          |
| pK026    | pTRE-Tight vector (Clontech)                           |
| pK029    | pCAG-loxP-STOP-loxP-RFP-ires-tTA-WPRE                  |
| pK031    | pTRE-Cre                                               |
| pK036    | pTRE-Flpe-WPRE                                         |
| pK037    | pCAG-FRT-STOP-FRT-RFP-ires-tTA-WPRE                    |
| pK038    | pCAG-loxP-STOP-loxP-EGFP-ires-tTA-WPRE                 |
| pK039    | pCAG-loxP-STOP-loxP-AmCyan-ires-tTA-WPRE               |
| pK046    | pCAG-loxP-STOP-loxP-RFP-WPRE                           |
| pK055    | pCAG-Dre-ires-puro.gcc vector                          |
| pK068    | pCAG-FRT-STOP-FRT-EGFP-ires-tTA-WPRE                   |
| pK073    | pTRE-Dre-WPRE                                          |
| pK078    | pJFRC176-10XUAS-rox-dSTOP-rox-myr::GFP (Addgene)       |
| pK098    | pCAG-loxP-STOP-loxP-nlstagRFP-ires-tTA-WPRE            |
| pK102    | pCAG-loxP-STOP-loxP-PSD95eGFP-ires-tTA-WPRE            |
| pK129    | pCAG-Rox-STOP-Rox-RFP-ires-tTA-WPRE                    |
| pK162    | pX330                                                  |
| pK165    | pAAV-EF1 $\alpha$ -RFP-WPRE                            |
| pK168    | pAAV-EF1 $\alpha$ -DIO-RFP-P2A-tTA-WPRE                |
| pK169    | pAAV-TRE-MCS-WPRE                                      |
| pK170    | pAAV-TRE-Cre-WPRE                                      |
| pK177    | pCAG-loxP-STOP-loxP-mir30 (GFP RNAi)                   |
| pK178    | pCAG-loxP-STOP-loxP-mir30 (GFP RNAi Scramble control)  |
| pK209    | pCMV- $\alpha$ 2-Chn-TALEN Left                        |
| pK210    | pCMV- $\alpha$ 2-Chn-TALEN Right                       |
| pK217    | pCAG-FRT-STOP-FRT- $\alpha$ 2Chn TALEN Left            |
| pK218    | pCAG-FRT-STOP-FRT- $\alpha$ 2Chn TALEN Right           |
| pK224    | pCAG-Rox-STOP-Rox-EGFP-ires-tTA-WPRE                   |
| pK225    | pCAG-loxP-STOP-loxP-mir30 (LacZ RNAi)                  |
| pK226    | pCAG-loxP-STOP-loxP-mir30 (LacZ RNAi Scramble control) |
| pK229    | pAAV-EF1 $\alpha$ -EGFP-WPRE                           |

|       |                                             |
|-------|---------------------------------------------|
| pK232 | pCAG-flex-3Flag-hspCas9                     |
| pK233 | pX330-U6-gRNALacZ                           |
| pK237 | pU6-gRNA-CAG-LSL-hspCas9 (add LSL to pX330) |
| pK238 | pU6-gRNACreb1(WI107/108)-CAG-LSL-hspCas9    |
|       |                                             |

## Supplementary Table 2. Primers used in this study.

| Primer | Primer Sequence (from 5' to 3')                                                                                      |
|--------|----------------------------------------------------------------------------------------------------------------------|
| HM050  | CGGTCGACGCCACCATGGTGAGCAAGGGCGAGGAGC                                                                                 |
| HM055  | GGAATCCTTAATTAAGTTCGATCTAGGATATCTTACTTGTACAGCTCGTCCATGCCGAGA                                                         |
| HM054  | TCTCGGCATGGACGAGCTGTACAAGTAAGATATCCTAGATCGAGTTAATTAAGGATTCC                                                          |
| HM035  | GGGCGGCCGCTTACTTAGTTACCCGGGAGCATGTCAAG                                                                               |
| HM079  | CCGTCGACCATGGGCCAAAGAAGAAGAGAAAGGTTTCGGTGTCTAAGGGCGAAG                                                               |
| HM075  | CCGATATCTTCAATTAAGTTGTGCCCCAGTTTGCTAGG                                                                               |
| AY101  | GGAAGGATCCTTGTGCTGTCTCATATTTTGG                                                                                      |
| AY102  | TTGCGGCCGCGGGCGGAATTCTTAATTAAGTTC                                                                                    |
| HM008  | GGGAATTCTAGAAGTTCCTATACTTTCTAGAGAATAGGAAGTTCATTAAGGGTCCGGATCCTCGGGACACCA                                             |
| HM009  | CCGTCGACATGAAGTTCCTATTCTCTAGAAAGTATAGGAAGTTCCTAGGTCCTCGACCTGCAGCCCAAGCTTA                                            |
| WL006  | CGAATTCGCC ACCATGGGTG CT                                                                                             |
| WL007  | TGCGGCCGCT CACTTTCC TCTT                                                                                             |
| HM084  | TGCTGTTGACAGTGAGCGA <u>AGCCACAACGCTCTATATCATGT</u> AGTGAAGCCACAGATGT <u>ACATGATATAGACGTTGTGGCT</u> GTGCCTACTGCCTCGGA |
| HM085  | TGCTGTTGACAGTGAGCGAGCTCATAGAAGCTCTACAATCTAGTGAAGCCACAGATGTAGATTGTAGAGCTTCTATGAGCGTGCCTACTGCCTCGGA                    |
| HM082  | CAGAAGGCTCGAGAAGGTATATTGCTGTTGACAGTGAGCG                                                                             |
| HM083  | CTAAAGTAGCCCTTGAATTCGAGGCAGTAGGCA                                                                                    |
| HM088  | GCGGCCGCATCGATGATATC                                                                                                 |
| HM089  | GATAGGCAGCCTGCACCTGAG                                                                                                |
| WL090  | TGCTGTTGACAGTGAGCGA <u>AAATCGCTGATTTGTGTAGT</u> CTAGTGAAGCCACAGATGT <u>AGACTACACAATCAGCGATTT</u> GTGCCTACTGCCTCGGA   |
| WL091  | TGCTGTTGACAGTGAGCGAGGCAACTTCGGTTAGTATTTATAGTGAAGCCACAGATGTATAAATACTAACC GAAGTTGCCGTGCCTACTGCCTCGGA                   |
| WL107  | CACCGTTGTCTGCTCCAGATTCCA                                                                                             |
| WL108  | AAACTGGAATCTGGAGCAGACAAC                                                                                             |
| HM010  | GGGAATTCTAATAAAGTTCGATAGCATACTTATACGAAGTTATATTAAGGGTCCGGATCCTCGGGGACACC                                              |
| HM007  | CCGTCGACATATAAAGTTCGATATAATGTATGCTATACGAAGTTATTAGGTCCTCGACCTGCAGCCCAAGCTTA                                           |
| HM026  | CGAATTCGACAGTCGACGGTACCGAGGGCC                                                                                       |
| HM030  | GTCGCGGCCGCATCATCTGTGCCCCAGTTT                                                                                       |
| HM019  | GCGGCCGCTCAACCTCTGGATTACAAAATT                                                                                       |
| HM020  | GCGGCCGCTGCGGGGAGGCGGCCCAAGGG                                                                                        |
| WL105  | GCTTTGAGTCCATCCACGAT                                                                                                 |

WL106 GCAGGGACTCCCAATAGACA  
WL111 CACCACGGCCACCGATATTA  
WL112 GTATCGCCAAAATCACCGCC  
WL113 GCATTTGCTAACTTAACCACCACA  
WL114 GGCTGGGCTTGAAGTGTGCAT  
RY78 5'-TGCTAGCGCCACCATGTCTAGACTGGA-3'  
RY79 5'-TGGATCCCCCGGGAGCATGTCAAGGT-3'  
RY69 5'-AGGATCCGGAAGCGGAGCTACTAACTTCAGCCTGCTGAAGCAGGCTGGAGACGTGGAGGAGAACCCTGGACCTATGAGCGAGCTGATCA-3'  
RY80 5'-AGGCGCGCCTCATCTGTGCCCCAGTTT-3'  
WL103 5'-CTGAATTCGCCACCATGGTGAGCAAGGGCGAGGAGC-3'  
WL104 5'-CGGATCCTTACTTGTACAGCTCGTCCATGCCGAGAG-3'  
WL123 5'-GTATGGAGCAAGGGCAAG-3'  
WL124 5'-AGGCGGAGATTGCAGTGAG-3'

In order of appearance in the Online Methods.
